# Supplementary material for: Ovarian Hormone-Dependent Effects of Dietary Lipids on APP/PS1 Mouse Brain
Source: PubMed Central journal article supplement (PMC6930904; doi:10.3389/fnagi.2019.00346), 2019-12-19
Supplement: Table_1.pdf [file Table_1.pdf]

*Supplementary Material*

**SUPPLEMENTARY TABLE 1**

| <b>Densitometric data from Western blots of the different proteins analyzed. All values are normalized with respect to the loading control, <math>\beta</math>-Actin</b> |     |        |        |        |        |           |          |            |               |        |
|--------------------------------------------------------------------------------------------------------------------------------------------------------------------------|-----|--------|--------|--------|--------|-----------|----------|------------|---------------|--------|
| Experimental conditions                                                                                                                                                  |     | GFAP   | PI3K   | Akt    | GSK3   | GSK3-pSer | Synapsin | p-Synapsin | Synaptophysin | PSD95  |
| SHAM                                                                                                                                                                     | DI  | 0.2749 | 0.3392 | 0.6290 | 0.6559 | 0.4044    | 0.7059   | 0.5684     | 3.1042        | 1.2441 |
|                                                                                                                                                                          |     | 0.3207 | 0.3381 | 0.7991 | 0.7700 | 1.0129    | 0.8521   | 1.7455     | 2.3620        | 1.5932 |
|                                                                                                                                                                          |     | 0.3321 | 0.2964 | 1.1512 | 0.8376 | 0.7016    | 0.8698   | 2.4450     | 3.4808        | 1.6544 |
|                                                                                                                                                                          |     | 0.3011 | 0.4642 | 1.3635 | 0.7100 | 0.7701    | 0.8703   | 1.7718     | 3.0756        | 1.5401 |
|                                                                                                                                                                          | DII | 0.3604 | 0.5685 | 1.5375 | 0.5611 | 0.3417    | 0.9827   | 0.6319     | 2.8145        | 1.6854 |
|                                                                                                                                                                          |     | 0.9494 | 0.7329 | 1.5432 | 0.9590 | 0.6788    | 1.2966   | 1.0062     | 5.1598        | 2.1537 |
|                                                                                                                                                                          |     | 1.0302 | 0.7034 | 2.0584 | 0.8850 | 0.5312    | 1.5268   | 0.3966     | 3.0217        | 2.4011 |
|                                                                                                                                                                          |     | 1.4837 | 0.8459 | 1.3290 | 1.0400 | 0.7470    | 1.9749   | 0.5013     | 4.8369        | 3.1830 |
| OVX                                                                                                                                                                      | DI  | 0.1710 | 0.3580 | 0.2005 | 0.3343 | 0.3343    | 0.3288   | 0.8040     | 0.5499        | 0.3130 |
|                                                                                                                                                                          |     | 0.1830 | 0.2777 | 0.1751 | 0.3152 | 0.2152    | 0.3524   | 0.5840     | 0.7183        | 0.3520 |
|                                                                                                                                                                          |     | 0.1740 | 0.2206 | 0.2507 | 0.2833 | 0.2186    | 0.4082   | 0.7470     | 0.5786        | 0.3630 |
|                                                                                                                                                                          |     | 0.2580 | 0.4349 | 0.2223 | 0.5826 | 0.3299    | 0.6246   | 0.3910     | 1.2126        | 0.5280 |
|                                                                                                                                                                          | DII | 0.2730 | 0.5660 | 0.5364 | 0.6315 | 0.3928    | 0.6078   | 0.2280     | 1.2640        | 0.4090 |
|                                                                                                                                                                          |     | 0.2100 | 0.3025 | 0.2810 | 0.4465 | 0.4719    | 0.9288   | 0.4490     | 0.6118        | 0.5020 |
|                                                                                                                                                                          |     | 0.2520 | 0.3848 | 0.4446 | 0.4731 | 0.7846    | 1.2036   | 0.3100     | 0.6361        | 0.7010 |
|                                                                                                                                                                          |     | 0.2520 | 0.4881 | 0.8916 | 0.5230 | 0.5469    | 0.7262   | 0.2590     | 1.6712        | 0.3990 |
| OVX-E                                                                                                                                                                    | DI  | 0.2160 | 0.1696 | 0.2250 | 0.2273 | 0.2131    | 0.3087   | 0.4740     | 0.8131        | 0.2820 |
|                                                                                                                                                                          |     | 0.2260 | 0.2211 | 0.5316 | 0.1910 | 0.3214    | 0.5858   | 0.5110     | 0.7832        | 0.3730 |
|                                                                                                                                                                          |     | 0.1920 | 0.2991 | 0.3086 | 0.1912 | 0.2431    | 0.3535   | 0.3720     | 0.5330        | 0.2640 |
|                                                                                                                                                                          |     | 0.2260 | 0.4379 | 0.3770 | 0.1711 | 0.2216    | 0.3932   | 0.3760     | 0.5696        | 0.3020 |
|                                                                                                                                                                          | DII | 0.1690 | 0.3823 | 0.8368 | 0.2641 | 0.1554    | 0.3613   | 0.1080     | 0.8612        | 0.2740 |
|                                                                                                                                                                          |     | 0.1420 | 0.3182 | 0.3269 | 0.2607 | 0.1448    | 0.2517   | 0.0950     | 0.8243        | 0.1990 |
|                                                                                                                                                                          |     | 0.1720 | 0.2899 | 0.3043 | 0.3269 | 0.1793    | 0.3240   | 0.1100     | 0.9822        | 0.2420 |
|                                                                                                                                                                          |     | 0.1530 | 0.2847 | 0.0987 | 0.3043 | 0.1859    | 0.3459   | 0.1090     | 1.2263        | 0.2380 |

SHAM: Intact, sham-operated controls

OVX: Ovariectomized, placebo-treated

OVX-E: Ovariectomized, estradiol-treated
